# Supplementary material for: The genome sequence of the outbreeding globe artichoke constructed de novo incorporating a phase-aware low-pass sequencing strategy of F1 progeny
Source: PubMed Central journal article supplement (PMC4726258; doi:10.1038/srep19427), 2016-01-20
Supplement: srep19427-s1.pdf [file srep19427-s1.pdf]

# The genome sequence of the outbreeding globe artichoke constructed *de novo* incorporating a phase-aware low-pass sequencing strategy of F<sub>1</sub> progeny

Davide Scaglione<sup>1,2,6,\*</sup>, Sebastian Reyes-Chin-Wo<sup>2</sup>, Alberto Acquadro<sup>1,\*</sup>, Lutz Froenicke<sup>2</sup>, Ezio Portis<sup>1</sup>, Christopher Beitel<sup>2</sup>, Matteo Tirone<sup>1</sup>, Rosario Mauro<sup>3</sup>, Antonino Lo Monaco<sup>3</sup>, Giovanni Mauromicale<sup>3</sup>, Primetta Faccioli<sup>4</sup>, Luigi Cattivelli<sup>4</sup>, Loren Rieseberg<sup>5</sup>, Richard Michelmore<sup>2,7</sup>, Sergio Lanteri<sup>1,7</sup>

<sup>1</sup> DISAFA, Plant Genetics and Breeding, University of Turin, Grugliasco, Italy

<sup>2</sup> The Genome Center, University of California, Davis, CA, USA

<sup>3</sup> Di3A, University of Catania, Catania, Italy

<sup>4</sup> Consiglio per la ricerca in agricoltura e l'analisi dell'economia agraria, Genomics Research Centre, Fiorenzuola d'Arda, Italy

<sup>5</sup> University of British Columbia, Vancouver, BC, Canada

<sup>6</sup> Current address: IGA Technology Services, Udine, Italy

<sup>7</sup> Joint senior authors.

\* Corresponding author.

## Inventory of Supplementary Information:

- Supplementary Figures S1-S8
- Supplementary Tables S1-S10
- Supplementary data
- Supplementary file list (S1, S2, S3)

# Supplementary Figures S1-S8

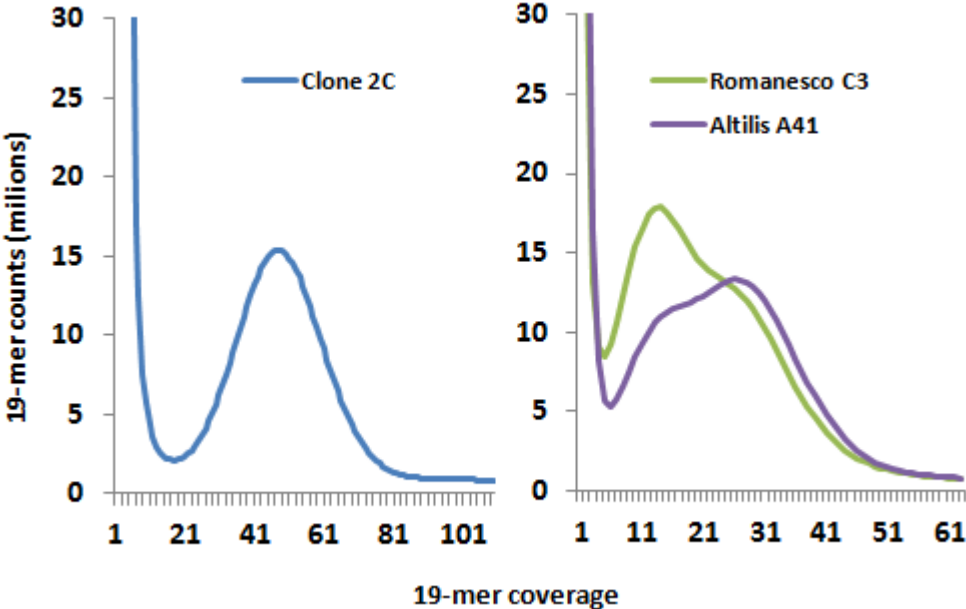

Figure S1 | K-mer spectra analysis using 19-mer counts. Clone “2C” (left) showed significantly lower heterozygosity compared to that of cultivated “Romanesco C3” artichoke and “Altilis A41” cardoon genotypes (right). Among cultivated genotypes the difference between globe artichoke and cardoon was also evident and in agreement with previous reports (Portis *et al.*, 2005).

### Exon length distribution

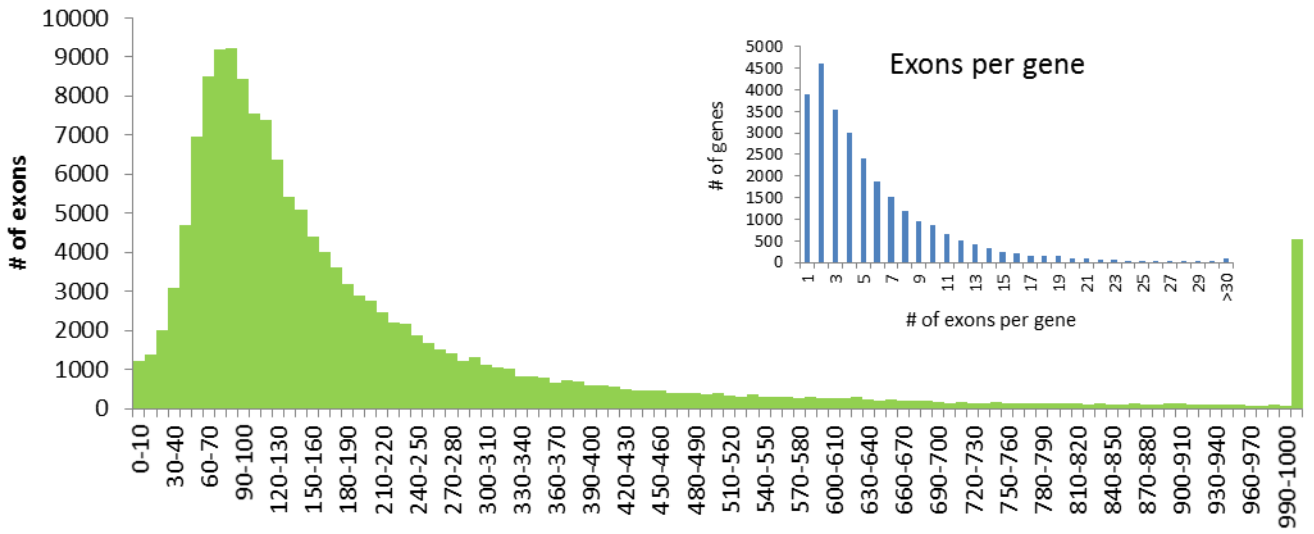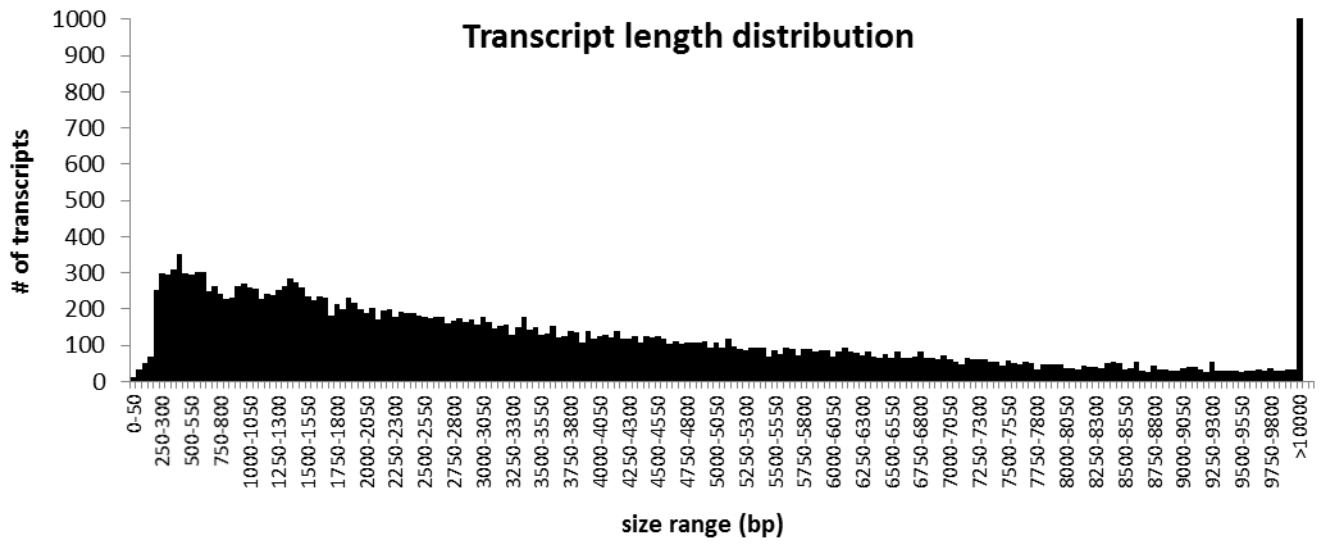

Figure S2 | Exon and transcript length distribution.

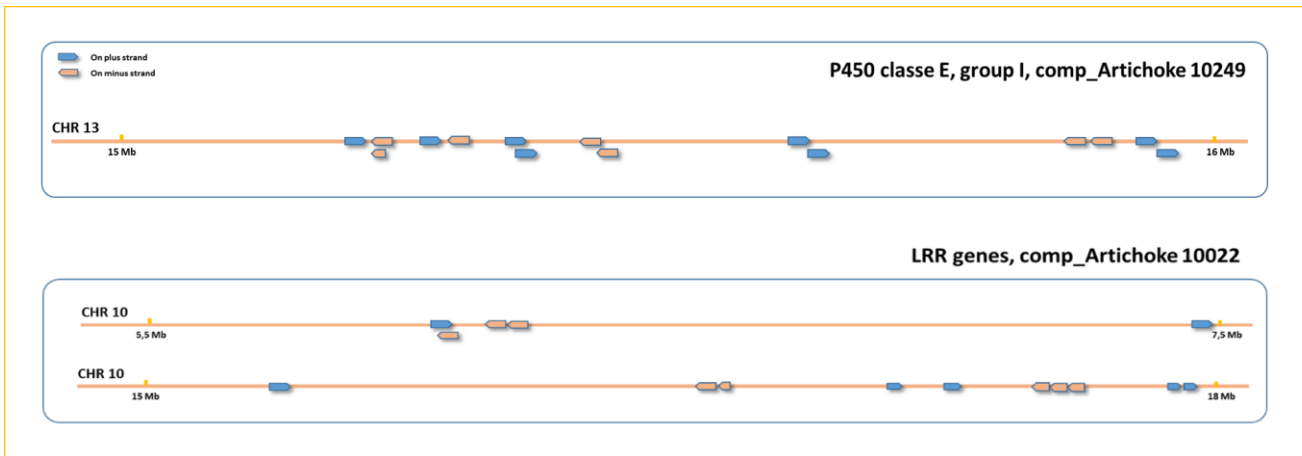

Figure S3A | Gene clustering of some globe artichoke specific OrthoMCL gene groups

Phylogeny of globe artichoke expanded P450 class E, group I, comp\_Artichoke 10249

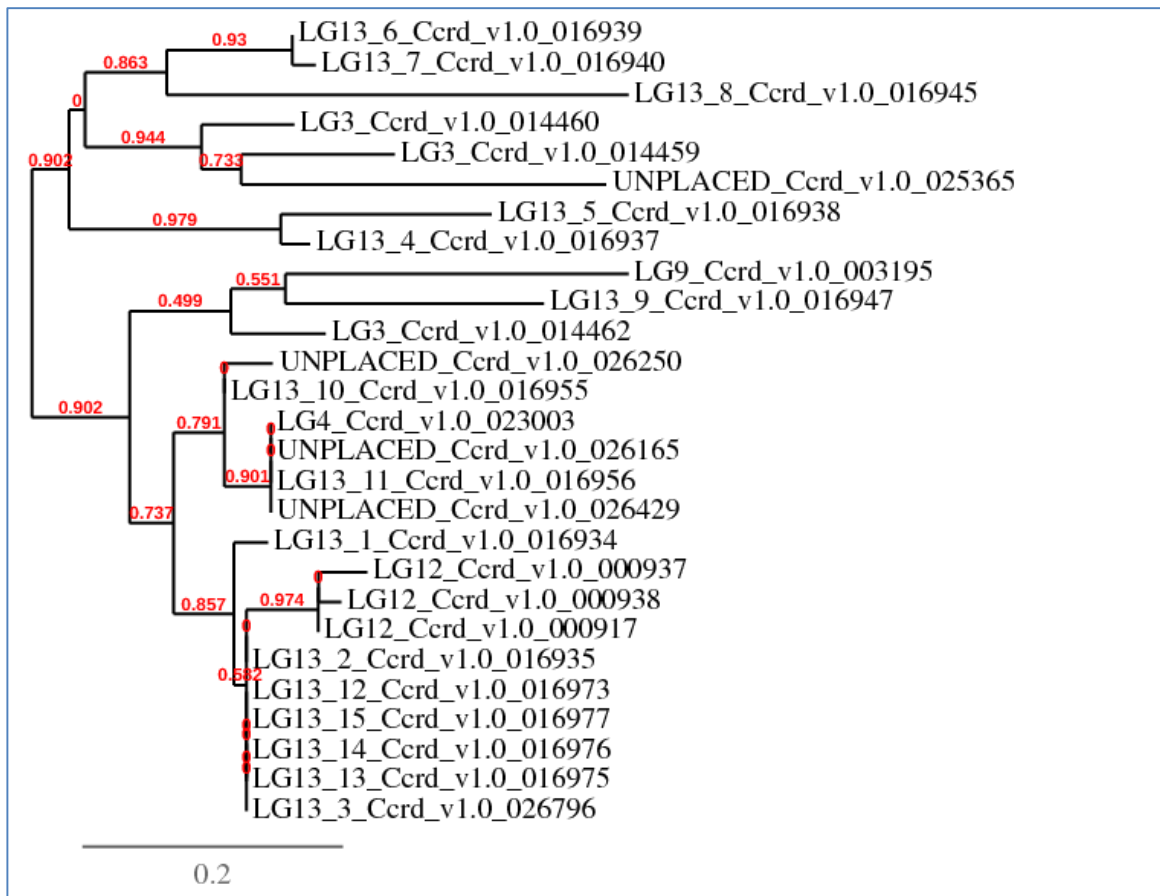

Figure S3B | Phylogeny of globe artichoke expanded P450 class E, group I, comp\_Artichoke 10249.

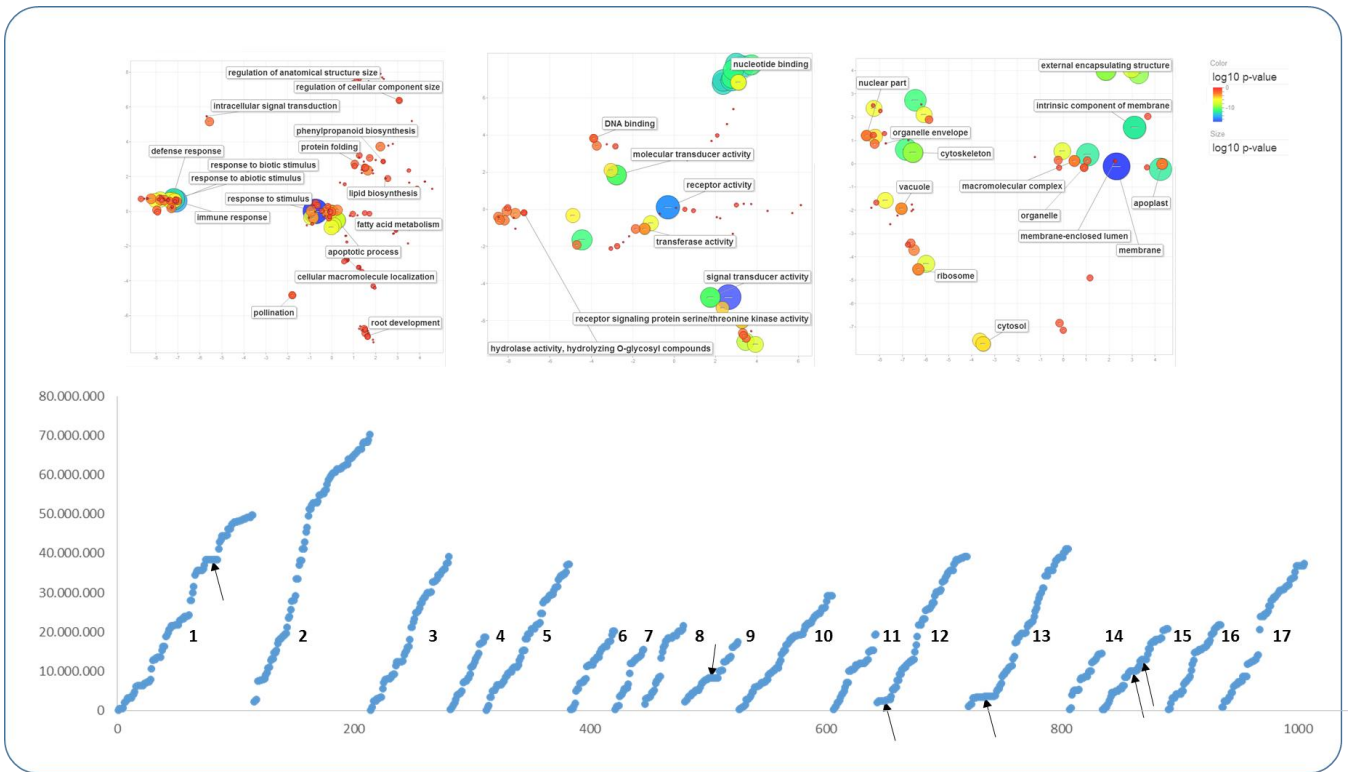

**Figure S3C | GO enrichment diagram for the 1170 globe artichoke specific genes in the process, function and component.** Enrichment was calculated with AgriGo (<http://bioinfo.cau.edu.cn/agriGO>) and visualized with the REVIGO suite (<http://revigo.irb.hr>). Genomic distribution of the 1,170 globe artichoke specific genes along the 17 chromosomes. Black arrows show gene clusters.

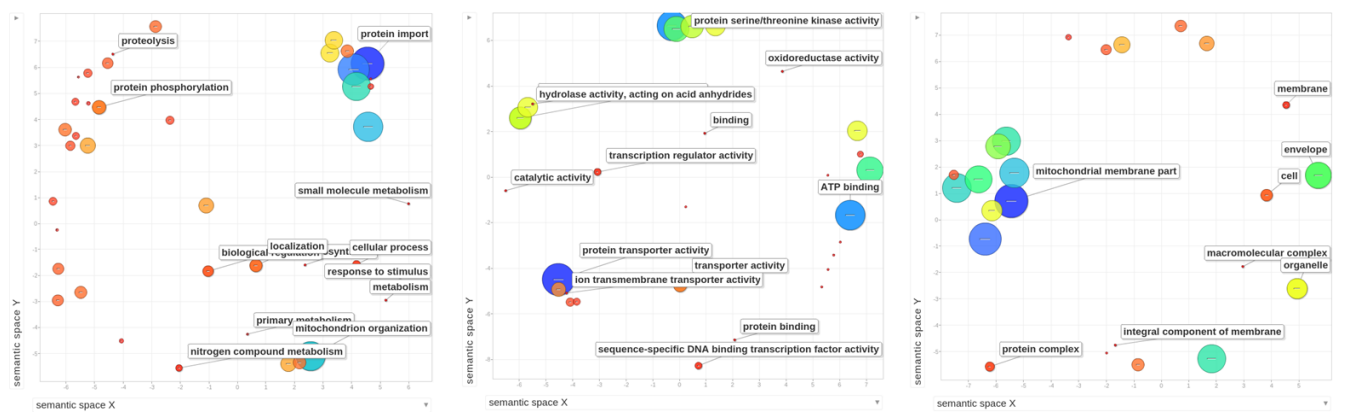

**Figure S3D | Analysis of MiRNA target enrichment in the globe artichoke transcriptome.** (a) Representation GO category enriched in the miRNA target transcriptome subset separated in the three component (BP, MF, CC from left to right); X axis is expressed in log10 p-value, Y axis is expressed in log10 p-value.

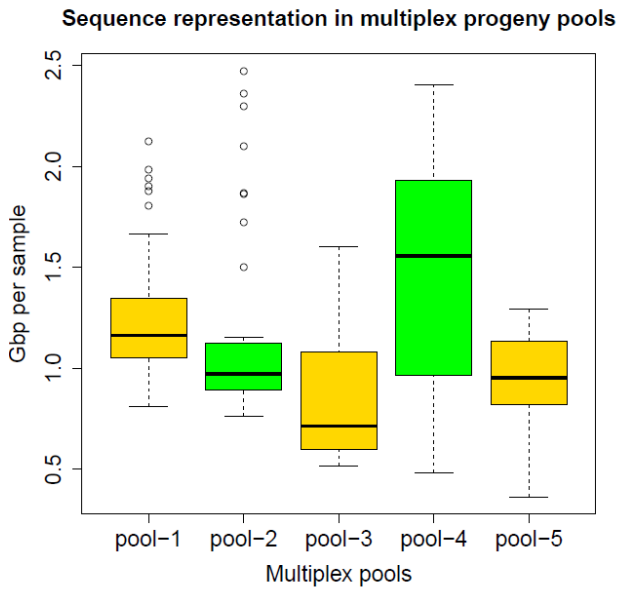

**Figure S4** | Per-sample raw base pairs sequencing output on the five multiplexed runs used to collect low coverage (1X) progeny-wide reads.

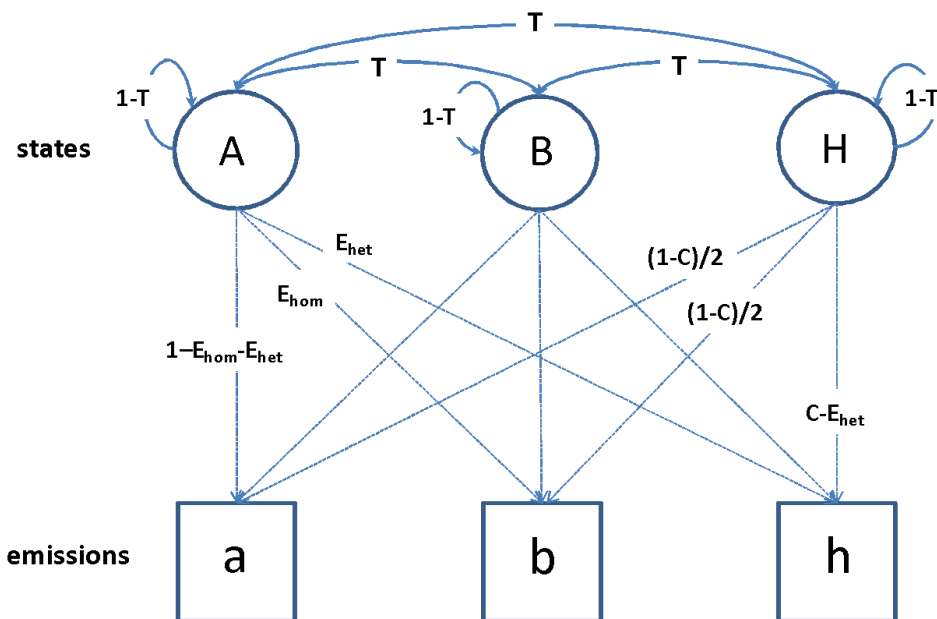

**Figure S5** | Graphical representation of the HMM model developed for the decoding of most probable genotype paths given the observation of SNP calls at low coverage in an expected heterozygosity scenario. A, B, H are possible states of underlying sequence, while *a*, *b* and *h* represent low coverage calls obtained from illumina reads.  $E_{het}$  and  $E_{hom}$  are the probability of false heterozygous calling for a given site.  $C$  is the probability of obtaining a heterozygous call at a given site by the presence of reads from both alleles.  $T$  is the probability of transition from one genotype to another (i.e. crossing-over events).

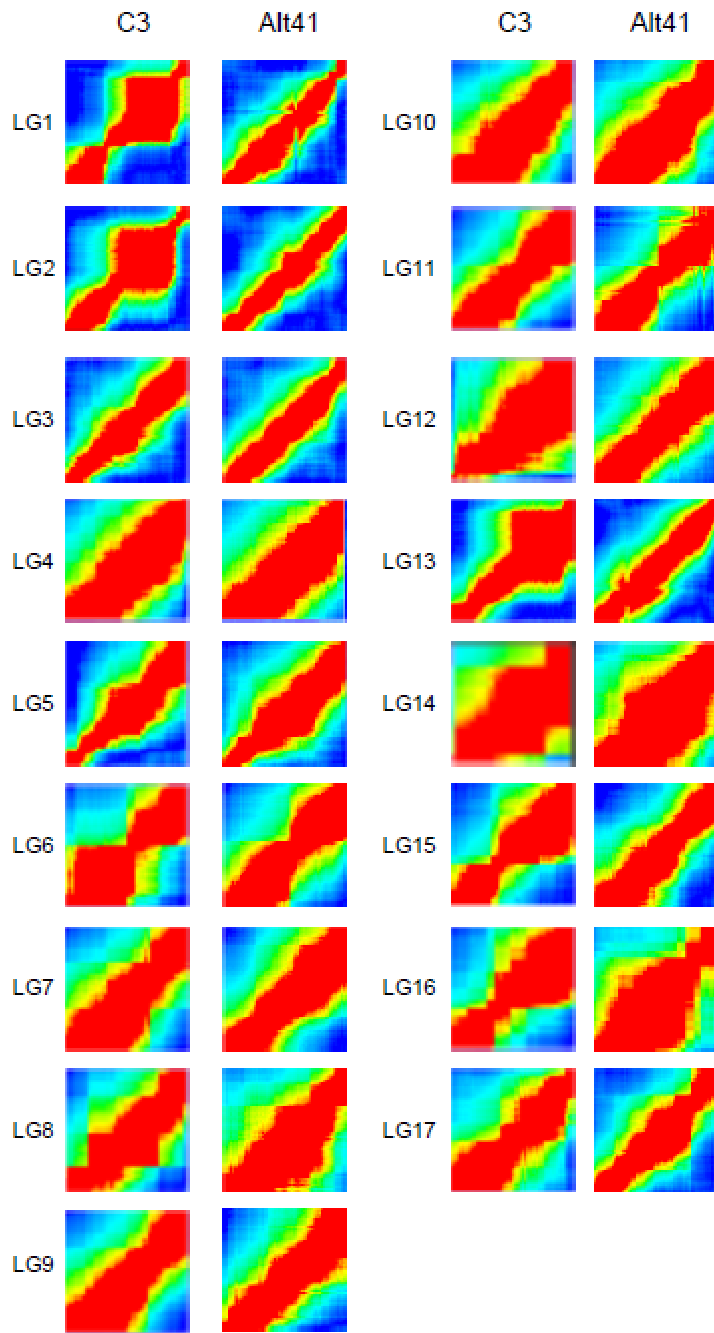

**Figure S6 | Heat maps of the recombinant fraction (upper left sector) and LOD scores (bottom right sector) of linkage maps generated for Romanesco C3 and Alt41 parents. Red corresponds to lowest recombination fraction and highest LOD scores.**

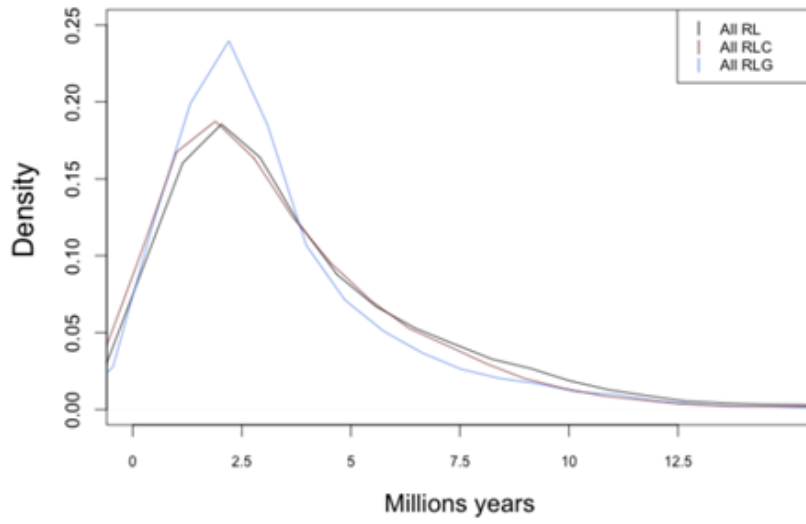

Figure S7 | Distribution of insertion ages of LTR elements



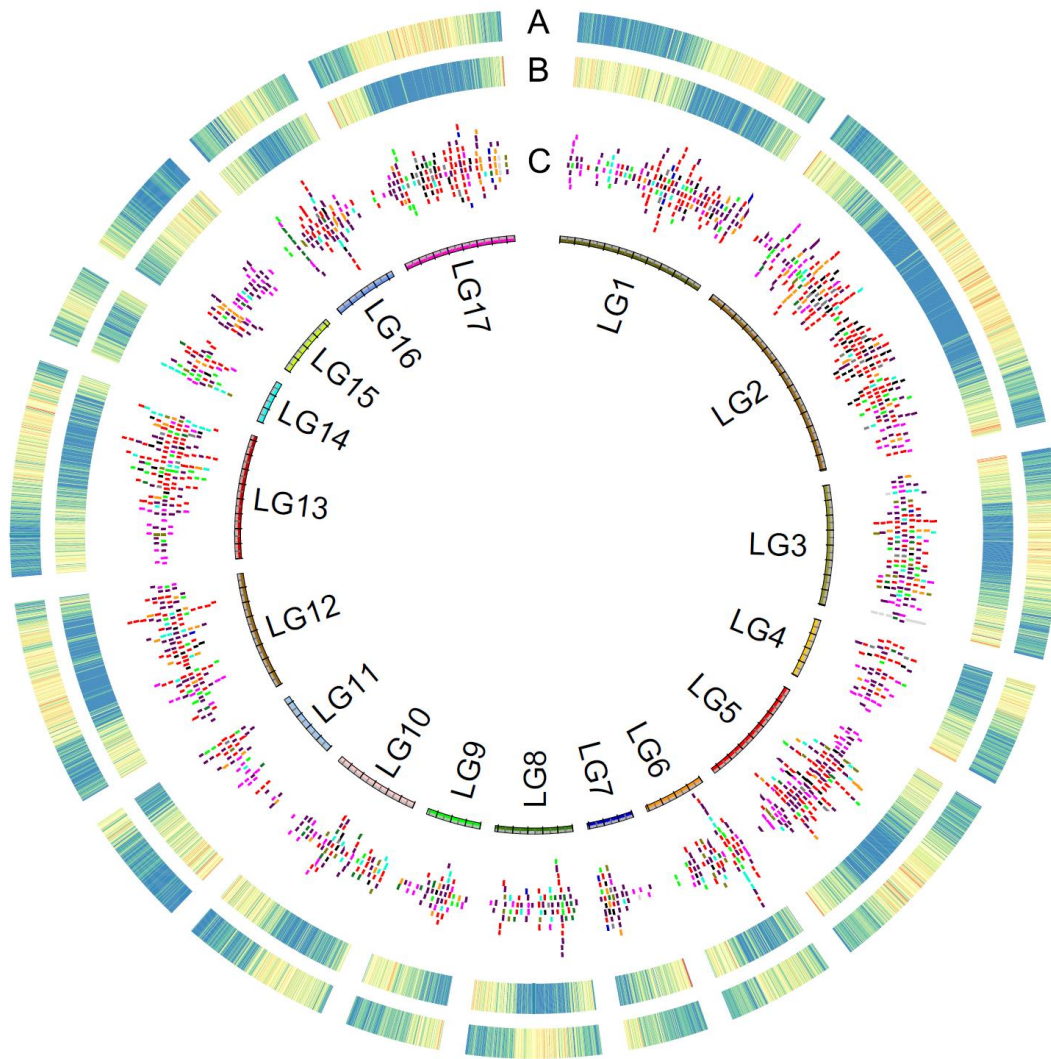

**Figure S8 | Distribution of satellite sequences.** Density of repeats (A) and genes (B) are report as heat map. Color-coded blocks (C) report non-consecutive occurrences of a given monomer along the sequence. Monomer are referred as in Supplementary Table S10; red: Cluster\_0-10[96bp]; green: Cluster\_1-4-8[136bp]; blue: Cluster\_11-14[148bp]; violet: Cluster\_12[103bp]; light-blue: Cluster\_15[100bp]; dark-green: Cluster\_16[82bp]; purple: Cluster\_2[94bp]; black: Cluster\_3[105bp]; olive: Cluster\_5[111bp]; orange: Cluster\_6-7[152bp]; grey: Cluster\_9[106bp].

## Supplementary Tables S1-S10

**Table S1a | Alignment statistics obtained using GMAP.** The x parameter represents the amount of unaligned sequence that triggers search for the remaining sequence (default 40). It enables alignment of chimeric reads and may help with some non-chimeric reads. To turn off, -x was set to zero.

| chimera margins (-x)  | off    | 100    | 200    | 300    | 400    |
|-----------------------|--------|--------|--------|--------|--------|
| Unique alignments     | 29,349 | 31,459 | 33,729 | 34,721 | 35,138 |
| Multixonic alignments | 1,893  | 1,817  | 1,827  | 1,871  | 1,880  |
| No mapping            | 978    | 978    | 978    | 978    | 978    |
| Putative chimeras     | 6,506  | 4,472  | 2,193  | 1,156  | 730    |
| Mapping percentage    | 80.67% | 85.93% | 91.81% | 94.49% | 95.59% |

**Table S1b | Results of CEGMA analysis.** Core eukaryotic genes (CEGs) are classified as four groups based on their average degree of conservation. Group 1 represents the least conserved genes of the reference set 248 CEGs, with the conservation degree increasing in subsequent groups through to group 4. Header legend: first column = number of 248 ultra-conserved CEGs present in genome; second column = percentage of 248 ultra-conserved CEGs present; third column = total number of CEGs present including putative orthologs; fourth column = average number of orthologs per CEG; fifth column = percentage of detected CEGs having more than 1 ortholog.

|                            | CEGs found in assembly | 248 CEGs set coverage (%) | # of putative CEGs | avg. # orthologs per CEG | CEGs w/ multiple orthologs (%) |
|----------------------------|------------------------|---------------------------|--------------------|--------------------------|--------------------------------|
| <b>Complete alignments</b> | 210                    | 84.68                     | 390                | 1.86                     | 50.95                          |
| <i>Group1</i>              | 53                     | 80.30                     | 94                 | 1.77                     | 43.40                          |
| <i>Group2</i>              | 46                     | 82.14                     | 78                 | 1.70                     | 45.65                          |
| <i>Group3</i>              | 50                     | 81.97                     | 99                 | 1.98                     | 56.00                          |
| <i>Group4</i>              | 61                     | 93.85                     | 119                | 1.95                     | 57.38                          |
| <b>Partial alignments</b>  | 239                    | 96.37                     | 534                | 2.23                     | 66.95                          |
| <i>Group1</i>              | 63                     | 95.45                     | 123                | 1.95                     | 55.56                          |
| <i>Group2</i>              | 54                     | 96.43                     | 114                | 2.11                     | 61.11                          |
| <i>Group3</i>              | 58                     | 95.08                     | 142                | 2.45                     | 75.86                          |
| <i>Group4</i>              | 64                     | 98.46                     | 155                | 2.42                     | 75.00                          |

**Table S2 | De novo sequencing statistics for the two mapping parents.**

| library              | reads              | Gbp          | raw coverage |
|----------------------|--------------------|--------------|--------------|
| C3-300bp             | 409,019,306        | 40.90        | 38           |
| C3-600bp             | 111,342,540        | 11.13        | 10           |
| <b>Total (C3)</b>    | <b>520,361,846</b> | <b>52.03</b> | <b>48</b>    |
| Alt41-300bp          | 365,978,250        | 36.60        | 34           |
| Alt41-600bp          | 101,646,880        | 10.16        | 9            |
| <b>Total (Alt41)</b> | <b>467,625,130</b> | <b>46.76</b> | <b>43</b>    |

**Table S3 | Pseudomolecule statistics.** In the last column the pseudomolecules and linkage group, as depicted in Portis *et al.*, 2009, relationships are reported; the nomenclature is from the C3 map.

| Chr                | length (bp) | avg. scaffold length | avg. GC content | non-AGCT bases | N° scaffolds | oriented scaffolds | oriented bp | oriented bp (%) | C3 (cM) | Alt41 (cM) | 'C3' parental map |
|--------------------|-------------|----------------------|-----------------|----------------|--------------|--------------------|-------------|-----------------|---------|------------|-------------------|
| 1                  | 49707439    | 104647               | 34.40%          | 4211747        | 475          | 104                | 20760124    | 41.8%           | 146.35  | 182.62     | C1                |
| 2                  | 70339030    | 68623                | 35.80%          | 6880431        | 1025         | 174                | 26305745    | 37.4%           | 162.69  | 170.83     | C2                |
| 3                  | 40261365    | 111527               | 34.70%          | 3216535        | 361          | 68                 | 17965994    | 44.6%           | 117.13  | 142.67     | C3                |
| 4                  | 20147618    | 119926               | 34.60%          | 1493262        | 168          | 23                 | 7754853     | 38.5%           | 65.27   | 60.02      | C4                |
| 5                  | 37162917    | 110276               | 34.40%          | 3124327        | 337          | 50                 | 11700443    | 31.5%           | 116.42  | 115.36     | C5                |
| 6                  | 20611051    | 89225                | 34.60%          | 2027785        | 231          | 36                 | 7554461     | 36.7%           | 67.31   | 73.75      | C6                |
| 7                  | 15559887    | 170988               | 34.10%          | 1081502        | 91           | 27                 | 8988908     | 57.8%           | 66.03   | 79.05      | C7                |
| 8                  | 25924184    | 112714               | 34.80%          | 2005747        | 230          | 38                 | 8648700     | 33.4%           | 71.41   | 74.74      | C8                |
| 9                  | 18326914    | 106552               | 34.40%          | 1576491        | 172          | 43                 | 9416779     | 51.4%           | 60.65   | 83.17      | C9                |
| 10                 | 29104343    | 100707               | 34.70%          | 2400099        | 289          | 52                 | 12098280    | 41.6%           | 59.93   | 77.68      | C10               |
| 11                 | 22005725    | 196480               | 33.70%          | 1381011        | 112          | 34                 | 11778224    | 53.5%           | 64.93   | 128.76     | C11+C20           |
| 12                 | 39646955    | 85816                | 35.10%          | 3702100        | 462          | 51                 | 11008553    | 27.8%           | 70.28   | 91.45      | C12               |
| 13                 | 41505999    | 91222                | 34.70%          | 3530600        | 455          | 90                 | 17212358    | 41.5%           | 120.78  | 140.35     | C13+C18           |
| 14                 | 14475048    | 113086               | 34.00%          | 1073474        | 128          | 25                 | 5746158     | 39.7%           | 47.03   | 55.68      | C14               |
| 15                 | 21262825    | 172868               | 33.50%          | 1556777        | 123          | 45                 | 14447054    | 67.9%           | 70.39   | 103.32     | C15+C19           |
| 16                 | 21914710    | 115951               | 34.60%          | 1799640        | 189          | 21                 | 6168798     | 28.1%           | 67.82   | 65.64      | C16               |
| 17                 | 37690487    | 79516                | 35.90%          | 3591453        | 474          | 55                 | 12083853    | 32.1%           | 85.16   | 103.06     | C17               |
| <b>Chr Total</b>   | 525646497   | 114713               | 34.59%          | 44652981       | 5322         | 936                | 2,1E+08     | 40%             | -       | -          | -                 |
| <b>Unmapped</b>    | 199020768   | 24077                | 37%             | 25635496       | 8266         | -                  | -           | -               | -       | -          | -                 |
| <b>Grand Total</b> | 724667265   | 53091                | 36%             | 70288477       | 13588        | -                  | -           | -               | -       | -          | -                 |

**Table S4 | Largest protein groups ranked by number of members.**

| Cluster Rank | Number Of Proteins | Predicted Function               |
|--------------|--------------------|----------------------------------|
| 1            | 364                | LRR Kinases                      |
| 2            | 308                | LRR Kinases                      |
| 3            | 287                | EF-hand kinases                  |
| 4            | 273                | PPR Repeat                       |
| 5            | 210                | PPR Repeat                       |
| 6            | 174                | Cytochrome P450                  |
| 7            | 119                | UDP-glycosyltransferases         |
| 8            | 110                | 2OG-Fe(II) oxygenase superfamily |
| 9            | 98                 | Ulp1 protease family             |
| 10           | 86                 | GDSL-like Lipase/Acylhydrolase   |
| 11           | 83                 | Ras family                       |
| 12           | 78                 | Auxin responsive protein         |
| 13           | 77                 | Haem peroxidase superfamily      |
| 14           | 77                 | No apical meristem (NAM) protein |
| 15           | 77                 | Cytochrome P450                  |

**Table S5 | Most common functional annotations in the artichoke predicted proteins.**

| Description                                                     | Number of proteins |
|-----------------------------------------------------------------|--------------------|
| Protein kinase domain                                           | 1357               |
| Zinc finger                                                     | 1041               |
| Serine/Threonine protein kinases                                | 898                |
| Leucine Rich Repeat                                             | 607                |
| PPR repeat family                                               | 598                |
| Protein tyrosine kinase                                         | 498                |
| EF-hand domain                                                  | 424                |
| Cytochrome P450                                                 | 306                |
| ATPase family associated with various cellular activities (AAA) | 283                |
| Ring finger domain                                              | 267                |

**Table S6a | Statistical analysis of gene families per species.**

| Species                | Gene Number | Genes in Families | Unclustered Genes | Number of Families | Unique Families | Genes in Unique Families | Average number of genes per family |
|------------------------|-------------|-------------------|-------------------|--------------------|-----------------|--------------------------|------------------------------------|
| <i>A. thaliana</i>     | 27,416      | 23,172            | 4,244             | 16,781             | 422             | 1,254                    | 1.38                               |
| <i>B. rapa</i>         | 40,905      | 31,625            | 9,280             | 17,070             | 876             | 2,916                    | 1.85                               |
| <i>C. cardunculus</i>  | 27,196      | 20,509            | 6,687             | 14,810             | 418             | 1,170                    | 1.38                               |
| <i>F. vesca</i>        | 32,831      | 23,729            | 9,102             | 13,364             | 1,394           | 6,603                    | 1.77                               |
| <i>L. sativa</i>       | 38,919      | 29,184            | 9,735             | 16,258             | 1,435           | 5,950                    | 1.79                               |
| <i>S. lycopersicon</i> | 34,727      | 24,907            | 9,820             | 14,307             | 1,118           | 4,743                    | 1.74                               |

**Table S6b** | Statistical analysis of expanded gene families in globe artichoke/lettuce and in globe artichoke in a six-species comparison. Legend: Atha=Arabidopsis; Brap=Brassica; Ccar=globe artichoke; Fves=Strawberry; Slyc=tomato

**Prevalent expansion in globe artichoke**

| Clustering | Annotation                               | Group Name | Atha | Brap | Ccar | Fves | Lsat | Slyc | N° Species | Total Count | Mean Count | SD    | CV   | Adj $\chi^2$ |
|------------|------------------------------------------|------------|------|------|------|------|------|------|------------|-------------|------------|-------|------|--------------|
| -          | Cystatin domain                          | Comp10193  | 0    | 0    | 33   | 1    | 1    | 1    | 4          | 36          | 9,00       | 13,24 | 1,47 | 1.17<br>E-24 |
| Chr13      | E-class P450 group I signature           | Comp10249  | 0    | 0    | 27   | 0    | 1    | 4    | 3          | 32          | 5,33       | 10,73 | 2,01 | 2.11<br>E-3  |
| -          | Replication fact-A C-term domain (DUF23) | Comp10806  | 0    | 0    | 15   | 0    | 0    | 2    | 2          | 17          | 2,83       | 6,01  | 2,12 | 1.68<br>E-3  |
| -          | Glycosyltransferase family 10            | Comp13550  | 0    | 0    | 8    | 0    | 1    | 0    | 2          | 9           | 1,50       | 3,21  | 2,14 | NA           |

**Prevalent expansion in globe artichoke/lettuce**

| Clustering      | Annotation                                  | Group Name | Atha | Brap | Ccar | Fves | Lsat | Slyc | N° Species | Total Count | Mean Count | SD    | CV   | Adj $\chi^2$ |
|-----------------|---------------------------------------------|------------|------|------|------|------|------|------|------------|-------------|------------|-------|------|--------------|
| 2 - Chr10       | LRR                                         | Comp10022  | 1    | 1    | 20   | 10   | 55   | 9    | 6          | 96          | 16,00      | 20,36 | 1,27 | 2.50<br>E-20 |
| 3 - Chr 5,6,9   | Bulb-type mannose-specific lectin           | Comp10125  | 0    | 0    | 19   | 8    | 18   | 2    | 4          | 47          | 11,75      | 8,77  | 0,75 | 1.04<br>E-7  |
| 1 - Chr 10      | LRR                                         | Comp10027  | 0    | 0    | 19   | 3    | 71   | 0    | 3          | 93          | 15,50      | 28,18 | 1,82 | 6.14<br>E-3  |
| 4- Chr 2,13,3,6 | Pentatricopeptide (PPR)                     | Comp10088  | 0    | 0    | 36   | 0    | 21   | 0    | 2          | 57          | 9,50       | 15,46 | 1,63 | 5.66<br>E-3  |
| 1 - Chr 15      | Pathogenesis-related protein Bet v I family | Comp10405  | 0    | 0    | 13   | 0    | 11   | 0    | 2          | 24          | 4,00       | 6,23  | 1,56 | 2.38<br>E-3  |

**Table S6c** | Globe artichoke specific genes and their clustering coordinates. The main biological process for each cluster is reported.

| gene              | strand | LG | LG coordinates | PHMMER (uniprotKB db)                          | e-value (phmmmer) | PROCESS                    |                                    |
|-------------------|--------|----|----------------|------------------------------------------------|-------------------|----------------------------|------------------------------------|
| Ccrrd_v1.0_013577 | -      | 1  | 38.330.947     | Protein_ENHANCED_DOWNY                         | 9,8E-39           | Defense response to fungus |                                    |
| Ccrrd_v1.0_013578 | -      | 1  | 38.332.679     | Protein_ENHANCED_DOWNY                         | 1,3E-09           |                            |                                    |
| Ccrrd_v1.0_013579 | -      | 1  | 38.333.957     | Protein_ENHANCED_DOWNY                         | 2,1E-17           |                            |                                    |
| Ccrrd_v1.0_013580 | -      | 1  | 38.335.514     | Protein_ENHANCED_DOWNY                         | 4,8E-13           |                            |                                    |
| Ccrrd_v1.0_013581 | -      | 1  | 38.335.793     | Protein_ENHANCED_DOWNY                         | 5E-23             |                            |                                    |
| Ccrrd_v1.0_013582 | -      | 1  | 38.337.064     | Protein_ENHANCED_DOWNY                         | 2,6E-28           |                            |                                    |
| Ccrrd_v1.0_013583 | -      | 1  | 38.342.744     | Protein_ENHANCED_DOWNY                         | 6,8E-14           |                            |                                    |
| Ccrrd_v1.0_013584 | -      | 1  | 38.350.535     | Protein_ENHANCED_DOWNY                         | 4,5E-30           |                            |                                    |
| Ccrrd_v1.0_013585 | -      | 1  | 38.352.862     | Protein_ENHANCED_DOWNY                         | 9,3E-57           |                            |                                    |
| Ccrrd_v1.0_013586 | -      | 1  | 38.356.901     | Protein_ENHANCED_DOWNY                         | 1,1E-14           |                            |                                    |
| Ccrrd_v1.0_013587 | -      | 1  | 38.357.345     | Protein_ENHANCED_DOWNY                         | 5,2E-28           |                            |                                    |
| Ccrrd_v1.0_013882 | +      | 1  | 47.958.758     | LRR_receptor-like_serine/threonine-protein     | 1,2E-103          |                            | Defense response signaling pathway |
| Ccrrd_v1.0_013882 | +      | 1  | 47.962.409     | LRR_receptor-like_serine/threonine-protein     | 1,2E-103          |                            |                                    |
| Ccrrd_v1.0_013882 | +      | 1  | 47.966.732     | LRR_receptor-like_serine/threonine-protein     | 1,2E-103          |                            |                                    |
| Ccrrd_v1.0_013892 | -      | 1  | 48.128.505     | Receptor-like_protein_12                       | 4,6E-107          |                            |                                    |
| Ccrrd_v1.0_013892 | -      | 1  | 48.131.550     | Receptor-like_protein_12                       | 4,6E-107          |                            |                                    |
| Ccrrd_v1.0_013906 | +      | 1  | 48.313.838     | Myb-related_protein                            | 1,2E-17           |                            |                                    |
| Ccrrd_v1.0_013907 | +      | 1  | 48.325.308     | Transcription_factor_MYB51                     | 1,1E-12           |                            |                                    |
| Ccrrd_v1.0_013918 | -      | 1  | 48.499.373     | #N/D                                           | #N/D              |                            |                                    |
| Ccrrd_v1.0_013927 | -      | 1  | 48.653.548     | Probable_acyl-activating_enzyme_peroxisomal    | 3,5E-22           |                            |                                    |
| Ccrrd_v1.0_013928 | +      | 1  | 48.667.122     | Probable_acyl-activating_enzyme_peroxisomal    | 1,2E-20           |                            |                                    |
| Ccrrd_v1.0_013947 | -      | 1  | 48.983.694     | Disease_resistance-like_protein                | 3E-13             |                            |                                    |
| Ccrrd_v1.0_013947 | -      | 1  | 48.994.352     | TMV_resistance_protein                         | 3E-20             |                            |                                    |
| Ccrrd_v1.0_013952 | +      | 1  | 49.085.948     | Disease_resistance_protein                     | 2,4E-16           |                            |                                    |
| Ccrrd_v1.0_013953 | -      | 1  | 49.095.145     | Putative_Myb_family_factor                     | 8,6E-15           |                            |                                    |
| Ccrrd_v1.0_013954 | +      | 1  | 49.100.100     | Disease_resistance_protein                     | 5,9E-26           |                            |                                    |
| Ccrrd_v1.0_013998 | +      | 1  | 49.601.344     | Syntaxin-61                                    | 1E-17             |                            |                                    |
| Ccrrd_v1.0_013998 | +      | 1  | 49.606.095     | Syntaxin-61                                    | 1E-17             |                            |                                    |
| Ccrrd_v1.0_009654 | +      | 2  | 7.461.604      | Transcription_factor_BIM1                      | 0,0035            | Transcription regulation   |                                    |
| Ccrrd_v1.0_009654 | +      | 2  | 7.466.862      | Transcription_factor_BIM1                      | 0,0035            |                            |                                    |
| Ccrrd_v1.0_009658 | +      | 2  | 7.547.756      | unknown                                        | 0,42              |                            |                                    |
| Ccrrd_v1.0_009659 | -      | 2  | 7.549.840      | Tubulin_beta-2_chain                           | 7,4E-172          |                            |                                    |
| Ccrrd_v1.0_009676 | -      | 2  | 7.776.546      | Transcriptional_activator                      | 8,9E-48           |                            |                                    |
| Ccrrd_v1.0_009678 | -      | 2  | 7.804.691      | Myb-related_protein                            | 1E-47             |                            |                                    |
| Ccrrd_v1.0_010683 | +      | 2  | 61.492.858     | Stearoyl-[acyl-carrier-protein]_9-desaturase_6 | 7,7E-159          | Fatty Acids synthesis      |                                    |
| Ccrrd_v1.0_010683 | +      | 2  | 61.497.880     | Stearoyl-[acyl-carrier-protein]_9-desaturase_6 | 7,7E-159          |                            |                                    |
| Ccrrd_v1.0_010691 | +      | 2  | 61.661.811     | Stearoyl-[acyl-carrier-protein]_9-desaturase_6 | 8,6E-165          |                            |                                    |
| Ccrrd_v1.0_018157 | +      | 5  | 6.441.006      | Cyclin-dependent_kinase                        | 5,2E-113          | Cell cycle regulation      |                                    |
| Ccrrd_v1.0_018158 | +      | 5  | 6.446.869      | Cyclin-dependent_kinase                        | 2,5E-114          |                            |                                    |
| Ccrrd_v1.0_018159 | -      | 5  | 6.449.546      | Cyclin-dependent_kinase                        | 1,4E-129          |                            |                                    |
| Ccrrd_v1.0_001281 | -      | 5  | 6.451.678      | Cyclin-dependent_kinase                        | 2,3E-100          |                            |                                    |
| Ccrrd_v1.0_018176 | -      | 5  | 6.708.574      | Cyclin-dependent_kinase                        | 4,5E-114          |                            |                                    |
| Ccrrd_v1.0_018581 | +      | 5  | 20.768.511     | GTP-binding_nuclear_protein                    | 5,2E-18           | Protein transport          |                                    |
| Ccrrd_v1.0_018581 | +      | 5  | 20.769.926     | GTP-binding_nuclear_protein                    | 5,2E-18           |                            |                                    |
| Ccrrd_v1.0_018581 | +      | 5  | 20.771.685     | GTP-binding_nuclear_protein                    | 5,2E-18           |                            |                                    |
| Ccrrd_v1.0_018581 | +      | 5  | 20.772.331     | GTP-binding_nuclear_protein                    | 5,2E-18           |                            |                                    |
| Ccrrd_v1.0_022377 | -      | 6  | 11.215.709     | Calreticulin                                   | 1,5E-227          | Signal transduction        |                                    |
| Ccrrd_v1.0_022382 | -      | 6  | 11.427.186     | B2_protein                                     | 0,0018            |                            |                                    |
| Ccrrd_v1.0_022383 | +      | 6  | 11.441.485     | Putative_calmodulin-like_protein               | 0,000000063       |                            |                                    |
| Ccrrd_v1.0_022383 | +      | 6  | 11.442.672     | Putative_calmodulin-like_protein               | 0,000000063       |                            |                                    |
| Ccrrd_v1.0_022384 | +      | 6  | 11.465.132     | Calmodulin-like_protein                        | 0,000000025       |                            |                                    |
| Ccrrd_v1.0_022580 | +      | 6  | 16.109.439     | Two-pore_potassium_channel                     | 1,2E-30           | ion TM transport           |                                    |
| Ccrrd_v1.0_022583 | -      | 6  | 16.135.474     | Two-pore_potassium_channel                     | 1,4E-29           |                            |                                    |
| Ccrrd_v1.0_022582 | +      | 6  | 16.138.823     | Two-pore_potassium_channel                     | 2,3E-23           |                            |                                    |
| Ccrrd_v1.0_022584 | +      | 6  | 16.168.013     | Two-pore_potassium_channel                     | 5,2E-30           |                            |                                    |
| Ccrrd_v1.0_003123 | +      | 9  | 7.792.930      | Fibrillin-1                                    | 1,2E-79           | Photooxidative stress      |                                    |
| Ccrrd_v1.0_003124 | +      | 9  | 7.827.169      | Fibrillin-3                                    | 4,6E-48           |                            |                                    |
| Ccrrd_v1.0_003138 | -      | 9  | 8.112.291      | Wall-associated_receptor_kinase                | 5E-14             |                            |                                    |
| Ccrrd_v1.0_003138 | -      | 9  | 8.122.522      | Wall-associated_receptor_kinase                | 5E-14             |                            |                                    |
| Ccrrd_v1.0_003138 | -      | 9  | 8.125.063      | Wall-associated_receptor_kinase                | 5E-14             |                            |                                    |
| Ccrrd_v1.0_003138 | -      | 9  | 8.126.938      | Wall-associated_receptor_kinase                | 5E-14             |                            |                                    |
| Ccrrd_v1.0_003139 | -      | 9  | 8.158.833      | Fibrillin-1                                    | 2,4E-75           |                            |                                    |
| Ccrrd_v1.0_003140 | -      | 9  | 8.180.750      | Wall-associated_receptor_kinase                | 4,6E-12           |                            |                                    |
| Ccrrd_v1.0_003141 | -      | 9  | 8.203.319      | Fibrillin-3                                    | 3,1E-85           |                            |                                    |
| Ccrrd_v1.0_003142 | -      | 9  | 8.224.128      | Fibrillin-3                                    | 3,3E-86           |                            |                                    |

| gene             | strand | LG | LG coordinates | PHMMER (uniprotKB db)                        | e-value (phmmer) | PROCESS                           |
|------------------|--------|----|----------------|----------------------------------------------|------------------|-----------------------------------|
| Ccrd_v1.0_021222 | +      | 10 | 19,090.822     | Protein_SUPPRESSOR_OF_CONSTITUTIVE_1         | 5,5E-36          | Defence response                  |
| Ccrd_v1.0_023603 | +      | 10 | 19,179.725     | Probable_serine/threonine-protein_kinase     | 1,4E-99          |                                   |
| Ccrd_v1.0_021229 | +      | 10 | 19,252.203     | Receptor-like_protein_kinase                 | 2,7E-53          |                                   |
| Ccrd_v1.0_021232 | -      | 10 | 19,311.453     | Probable_serine/threonine-protein_kinase     | 4,1E-26          |                                   |
| Ccrd_v1.0_021232 | -      | 10 | 19,317.722     | Probable_serine/threonine-protein_kinase     | 4,1E-26          |                                   |
| Ccrd_v1.0_016160 | +      | 13 | 3.282.715      | Putative_receptor-like_protein               | 4,8E-71          | Defence response                  |
| Ccrd_v1.0_016161 | +      | 13 | 3.286.163      | Putative_receptor-like_protein               | 4,8E-59          |                                   |
| Ccrd_v1.0_016162 | +      | 13 | 3.299.609      | Receptor-like_protein_kinase                 | 4E-67            |                                   |
| Ccrd_v1.0_016164 | +      | 13 | 3.315.293      | Receptor-like_protein_kinase_1               | 1,9E-68          |                                   |
| Ccrd_v1.0_016165 | -      | 13 | 3.322.034      | TMV_resistance_protein                       | 1,4E-46          |                                   |
| Ccrd_v1.0_016170 | +      | 13 | 3.370.130      | Protein_SUPPRESSOR_OF_CONSTITUTIVE_1         | 1,7E-47          |                                   |
| Ccrd_v1.0_016173 | +      | 13 | 3.412.192      | unknown                                      | 0,09             |                                   |
| Ccrd_v1.0_016174 | +      | 13 | 3.427.346      | Protein_SUPPRESSOR_OF_CONSTITUTIVE_1         | 1,7E-47          |                                   |
| Ccrd_v1.0_016175 | +      | 13 | 3.440.527      | TMV_resistance_protein                       | 3,1E-16          |                                   |
| Ccrd_v1.0_016175 | +      | 13 | 3.440.527      | TMV_resistance_protein                       | 1,7E-16          |                                   |
| Ccrd_v1.0_016175 | +      | 13 | 3.447.201      | TMV_resistance_protein                       | 1,7E-16          |                                   |
| Ccrd_v1.0_016175 | +      | 13 | 3.447.202      | TMV_resistance_protein                       | 3,1E-16          |                                   |
| Ccrd_v1.0_016176 | +      | 13 | 3.462.836      | Protein_SUPPRESSOR_OF_CONSTITUTIVE_1         | 3,4E-43          |                                   |
| Ccrd_v1.0_016177 | +      | 13 | 3.476.304      | TMV_resistance_protein                       | 8,4E-20          |                                   |
| Ccrd_v1.0_016178 | +      | 13 | 3.482.883      | TMV_resistance_protein                       | 2,5E-15          |                                   |
| Ccrd_v1.0_016179 | +      | 13 | 3.492.917      | TMV_resistance_protein                       | 1,4E-18          |                                   |
| Ccrd_v1.0_016196 | -      | 13 | 3.799.430      | RNA_polymerase_II_5-mediating_protein        | 0,0000022        |                                   |
| Ccrd_v1.0_016267 | -      | 13 | 4.833.186      | Serine/threonine-protein_kinase-like_protein | 0,0000082        |                                   |
| Ccrd_v1.0_016291 | -      | 13 | 5.184.329      | Probable_receptor-like_protein               | 2,4E-69          |                                   |
| Ccrd_v1.0_008635 | +      | 14 | 4.964.500      | Chlorophyll_a-b_binding_16_chloroplastic     | 1,6E-162         | response to light stimulus        |
| Ccrd_v1.0_008642 | -      | 14 | 5.121.295      | Chlorophyll_a-b_binding_16_chloroplastic     | 6,6E-163         |                                   |
| Ccrd_v1.0_008644 | +      | 14 | 5.146.900      | ATP-dependent_Clp_protease_subunit_ClpA      | 0,0015           |                                   |
| Ccrd_v1.0_008645 | -      | 14 | 5.155.501      | Chlorophyll_a-b_binding_16_chloroplastic     | 2,1E-160         |                                   |
| Ccrd_v1.0_008646 | -      | 14 | 5.168.538      | Chlorophyll_a-b_binding_16_chloroplastic     | 2,8E-161         |                                   |
| Ccrd_v1.0_008647 | -      | 14 | 5.220.185      | Chlorophyll_a-b_binding_16_chloroplastic     | 3,4E-164         |                                   |
| Ccrd_v1.0_008736 | -      | 14 | 8.288.381      | Transcription_factor_MYB48                   | 6,3E-14          | Transcr. regulation               |
| Ccrd_v1.0_008736 | -      | 14 | 8.292.935      | Transcription_factor_MYB48                   | 6,3E-14          |                                   |
| Ccrd_v1.0_008737 | -      | 14 | 8.293.175      | Myb-related_protein_306_majus                | 1,3E-16          |                                   |
| Ccrd_v1.0_008997 | -      | 14 | 14.153.985     | Auxin_response_factor                        | 2,7E-71          | Auxin-activ. Signal. pathway      |
| Ccrd_v1.0_008999 | +      | 14 | 14.177.331     | Auxin_response_factor                        | 1,9E-83          |                                   |
| Ccrd_v1.0_009000 | +      | 14 | 14.188.710     | Auxin_response_factor                        | 1,2E-57          |                                   |
| Ccrd_v1.0_001911 | -      | 15 | 9.910.627      | Auxin-responsive_protein_SAUR22              | 4,3E-30          | Auxin-activated signaling pathway |
| Ccrd_v1.0_001912 | -      | 15 | 9.919.876      | Auxin-responsive_protein_SAUR22              | 4E-30            |                                   |
| Ccrd_v1.0_001914 | -      | 15 | 9.929.794      | Auxin-responsive_protein_SAUR21              | 5E-27            |                                   |
| Ccrd_v1.0_001921 | -      | 15 | 10.026.525     | Auxin-responsive_protein_SAUR19              | 5,4E-26          |                                   |
| Ccrd_v1.0_001923 | +      | 15 | 10.029.056     | Auxin-responsive_protein_SAUR22              | 3E-21            |                                   |
| Ccrd_v1.0_001922 | -      | 15 | 10.029.639     | Auxin-responsive_protein_SAUR21              | 1,5E-24          |                                   |
| Ccrd_v1.0_006281 | -      | 16 | 4.067.666      | Early_light-induced_protein_chloroplastic    | 1,6E-51          | response to high light intensity  |
| Ccrd_v1.0_006282 | -      | 16 | 4.074.913      | Early_light-induced_protein_chloroplastic    | 1,6E-48          |                                   |
| Ccrd_v1.0_006282 | -      | 16 | 4.075.565      | Early_light-induced_protein_chloroplastic    | 1,6E-48          |                                   |
| Ccrd_v1.0_006282 | -      | 16 | 4.079.627      | Early_light-induced_protein_chloroplastic    | 1,6E-48          |                                   |
| Ccrd_v1.0_006285 | -      | 16 | 4.116.754      | Early_light-induced_protein_chloroplastic    | 1E-50            |                                   |
| Ccrd_v1.0_006864 | +      | 16 | 21.154.883     | Protein_SUPPRESSOR_OF_CONSTITUTIVE_1         | 3,4E-22          | Defence response                  |
| Ccrd_v1.0_006905 | -      | 16 | 21.626.285     | Protein_SUPPRESSOR_OF_CONSTITUTIVE_1         | 2,3E-37          |                                   |
| Ccrd_v1.0_006906 | -      | 16 | 21.677.103     | Protein_SUPPRESSOR_OF_CONSTITUTIVE_1         | 1,3E-33          |                                   |
| Ccrd_v1.0_006908 | -      | 16 | 21.698.804     | Protein_SUPPRESSOR_OF_CONSTITUTIVE_1         | 2,3E-36          |                                   |
| Ccrd_v1.0_019921 | +      | 17 | 7.249.743      | WAT1-related_protein                         | 8,9E-51          | Auxin-activated signaling pathway |
| Ccrd_v1.0_019923 | +      | 17 | 7.281.844      | WAT1-related_protein                         | 1,8E-28          |                                   |
| Ccrd_v1.0_019925 | +      | 17 | 7.311.521      | WAT1-related_protein                         | 5,4E-51          |                                   |
| Ccrd_v1.0_019926 | +      | 17 | 7.327.575      | WAT1-related_protein                         | 5,9E-36          |                                   |

**Table S7 | Most abundant satellite sequences** found in the assembly. Occurrences are considered for non-consecutive repeats. Representative sequences are up to 10% divergent from their cluster components.

| Cluster name  | monomer size | occurrences | representative sequence                                                                                                                                         |
|---------------|--------------|-------------|-----------------------------------------------------------------------------------------------------------------------------------------------------------------|
| Cluster_0-10  | [96bp]       | 493         | GGTTAGTACAACCAGAGGCTCTGGTCGTGAAGCCAGAAGCTCTGGAAAGAGAGACC<br>AGAGGGGCTCTGGCTCGGATGTTGAATTATTTCTAAGTATG                                                           |
| Cluster_2     | [94bp]       | 477         | TGTTCAATGAAAGAAGTATTGTTCAAGTTGTTTCATATTGTTTCATATGTACA<br>CTAGCTGCATATCTCAACATTGGCTCGCTCCTGAATG                                                                  |
| Cluster_12    | [103bp]      | 191         | TGTGATAATGAATGTGATAATCATGTGATAATCACCGTTATACATCACTGGGTTAT<br>CGTTTTGGTTGATAAGTTAAATTTTTCGGTGTAATCATGTGATATGGG                                                    |
| Cluster_1-4-8 | [136bp]      | 116         | TTTTAGATTATTATCTTTATGAAATTACCAAATGACCCACAATTTGGAAATCGGT<br>ATTTAACAATACTTTACGTATTTGCTTTATAAAATTACGAAATGACCATATGTCTT<br>GGGAATTGGTATCTAAAATTTA                   |
| Cluster_3     | [105bp]      | 100         | TTCTATTTTCATCGGCCGCTGGTTCAACATCCATACTTAGAAAAATAATGGATTCT<br>CGTCCATCGGTCTCTGGTTCCACATACATACTTAGCAAACCAATGGAA                                                    |
| Cluster_15    | [100bp]      | 94          | ACGATCCATTAAGCCCAATACGATCCATTAAGCCCAATACGATCCATTAATCCC<br>AATACGATCCATTAACCCAATAACGATCCACTAAAGTCCAAT                                                            |
| Cluster_6-7   | [152bp]      | 89          | TTGAAGGTCCTTTGAACGAGTTGAGAAAGCCTACATGTAATGTTTTGACTACTAGA<br>AAGTCAAACCGTAGGTTTAGAGGAGTTTCATATGACTTTAAACTCTAAGTGTAAC<br>GGTTTGACTACTTGAAAGTCAAACCGTAGGTGTAATGAAG |
| Cluster_16    | [82bp]       | 46          | CTCAGACTTTTATACTGGTATGTCTTACAAGTCTGGAAGACAACCTTTGAATTTAAC<br>TGAGGAAAAAGGGTTCAGACTTATC                                                                          |
| Cluster_5     | [111bp]      | 44          | CCATTTTCGGCGGATTTCCGGCAGAAAATTAATAATTTTAAAAAAGAAATAAA<br>CAATTTTCGGCGGATTTCCGGCGGATAATTAATAATTTTCTAAAAAATTTA                                                    |
| Cluster_9     | [106bp]      | 39          | AAGAAGAACCAGAGGATCGATGGACGGATTGCTTAGTATTTTCTAAGTGTAGAA<br>GTTGAGCCAGAGGCTCTGGTCTTTGCAACCAGAAGCTCTGGTAAGTGCCCA                                                   |
| Cluster_11-14 | [148bp]      | 14          | GATTTAATAGTTGTCGTTGTTGTGCAATCCGGTCATAAATTTCCATGGACTTGT<br>TAAATCGTCTCTGACATTATTCGTCAAGTAAAGCTTAAAGATTCATCTGAAACCTT<br>GACCTATAACCCCTACGAATGTAATCGCCCCCTAC       |



**Table S8 | Chromosome-wise distribution of perfect SSRs.** Mononucleotide = min. 15 times; dinucleotides = min. 8 times; trinucleotides = min. 5 times; tetra/penta/hexa-nucleotides = min. 4 times, allowing for only one mismatch. For compound repeats, the maximum default interruption (spacer) = 100bp.

| <b>Chr</b>      | <b>Mono</b>  | <b>Di</b>      | <b>Tri</b>    | <b>Tetra</b>  | <b>Penta</b> | <b>Hexa</b>  | <b>Total</b>   | <b>Compound</b> | <b>Imperfect</b> |
|-----------------|--------------|----------------|---------------|---------------|--------------|--------------|----------------|-----------------|------------------|
| <b>1</b>        | 772          | 9,637          | 1,345         | 872           | 366          | 368          | 13,360         | 2,000           | 18,311           |
| <b>2</b>        | 747          | 10,834         | 1,993         | 893           | 359          | 386          | 15,212         | 2,228           | 21,071           |
| <b>3</b>        | 566          | 8,660          | 1,206         | 774           | 302          | 335          | 11,843         | 1,894           | 16,354           |
| <b>4</b>        | 304          | 4,553          | 507           | 349           | 171          | 155          | 6,039          | 942             | 8,163            |
| <b>5</b>        | 523          | 8,476          | 1,081         | 688           | 288          | 275          | 11,331         | 1,894           | 15,557           |
| <b>6</b>        | 284          | 4,683          | 517           | 414           | 161          | 133          | 6,192          | 1,061           | 8,478            |
| <b>7</b>        | 267          | 4,059          | 376           | 367           | 122          | 140          | 5,331          | 932             | 7,268            |
| <b>8</b>        | 369          | 5,894          | 752           | 537           | 244          | 189          | 7,985          | 1,333           | 11,040           |
| <b>9</b>        | 270          | 4,502          | 456           | 349           | 145          | 167          | 5,889          | 943             | 7,949            |
| <b>10</b>       | 434          | 5,797          | 781           | 447           | 184          | 227          | 7,870          | 1,253           | 10,762           |
| <b>11</b>       | 447          | 5,410          | 629           | 508           | 208          | 191          | 7,393          | 1,135           | 10,064           |
| <b>12</b>       | 474          | 7,436          | 1,087         | 651           | 217          | 238          | 10,103         | 1,546           | 13,842           |
| <b>13</b>       | 568          | 8,227          | 1,066         | 718           | 279          | 334          | 11,192         | 1,737           | 15,326           |
| <b>14</b>       | 241          | 4,002          | 342           | 347           | 136          | 113          | 5,181          | 915             | 7,034            |
| <b>15</b>       | 414          | 5,456          | 574           | 519           | 178          | 153          | 7,294          | 1,208           | 9,926            |
| <b>16</b>       | 295          | 4,921          | 594           | 416           | 165          | 141          | 6,532          | 1,088           | 8,936            |
| <b>17</b>       | 366          | 6,066          | 1,077         | 502           | 201          | 211          | 8,423          | 1,256           | 11,670           |
| <b>Unplaced</b> | 1,052        | 20,777         | 5,526         | 1,391         | 576          | 715          | 30,037         | 3,917           | 42,162           |
| <b>Total</b>    | <b>8,393</b> | <b>129,390</b> | <b>19,909</b> | <b>10,742</b> | <b>4,302</b> | <b>4,471</b> | <b>177,207</b> | <b>27,282</b>   | <b>243,913</b>   |

**Table S9 | MiRNA genes identified in the globe artichoke genome and number of putative coding regions for each miRNA type.**

| miRNA      | number of putative coding regions | miRNA        | number of putative coding regions |
|------------|-----------------------------------|--------------|-----------------------------------|
| miR1030    | 1                                 | miR414       | 31                                |
| miR1039    | 1                                 | miR419       | 3                                 |
| miR1078    | 1                                 | miR477       | 3                                 |
| miR1127    | 1                                 | miR479       | 2                                 |
| miR1155    | 1                                 | miR5021      | 7                                 |
| miR1171    | 1                                 | miR5058      | 1                                 |
| miR1435    | 2                                 | miR5161      | 1                                 |
| miR1436    | 1                                 | miR5174      | 4                                 |
| miR1439    | 1                                 | miR5181      | 1                                 |
| miR1446    | 3                                 | miR5185      | 1                                 |
| miR156/157 | 24                                | miR5203      | 2                                 |
| miR159/319 | 3                                 | miR530       | 3                                 |
| miR160     | 7                                 | miR5523      | 1                                 |
| miR164     | 3                                 | miR5543      | 1                                 |
| miR166     | 16                                | miR5653      | 2                                 |
| miR167     | 3                                 | miR5658      | 54                                |
| miR168     | 1                                 | miR5821      | 1                                 |
| miR169     | 17                                | miR6103      | 3                                 |
| miR171     | 3                                 | miR6104      | 6                                 |
| miR172     | 11                                | miR6105      | 910                               |
| miR1857    | 1                                 | miR6106      | 2                                 |
| miR1862    | 1                                 | miR6107      | 3                                 |
| miR1888    | 1                                 | miR6108      | 1495                              |
| miR2079    | 1                                 | miR6109      | 131                               |
| miR2102    | 1                                 | miR6110      | 161                               |
| miR2105    | 1                                 | miR6111      | 1                                 |
| miR2923    | 1                                 | miR6112      | 1301                              |
| miR390     | 1                                 | miR6114      | 2                                 |
| miR393     | 4                                 | miR6115      | 480                               |
| miR394     | 8                                 | miR6116      | 15                                |
| miR395     | 8                                 | miR6117      | 43                                |
| miR396     | 10                                | miR7741      | 1                                 |
| miR397     | 3                                 | miR7757      | 1                                 |
| miR399     | 5                                 | miR837       | 1                                 |
| miR403     | 1                                 | miR845       | 6                                 |
| miR407     | 2                                 | miR902       | 1                                 |
| miR408     | 1                                 | <b>TOTAL</b> | <b>4832</b>                       |

**Table S10 | miRNAs classification** based on miRNA presence in RR, NRR, MIX regions.

| Elements only in "RR": 22                | Elements only in "NRR": 30                                                  | "MIXED": 21                                                                      |
|------------------------------------------|-----------------------------------------------------------------------------|----------------------------------------------------------------------------------|
| miR1030 (1 locus) ( <i>Ppt</i> )         | miR1039 (1 locus) ( <i>Ppt</i> )                                            | miR156/157 (24 loci, 2RR) ( <i>Htu, Sly, Stu, Nta, Vvi, Ath, Osa, Bdi, Ppt</i> ) |
| miR1127 (1 locus) ( <i>Bdi</i> )         | miR1078 (1 locus) ( <i>Ppt</i> )                                            | miR159/319 (3 loci, 1RR) ( <i>Htu, Sly, Stu, Nta, Vvi, Ath, Osa, Bdi, Ppt</i> )  |
| miR1171 (1 locus) ( <i>Cre</i> )         | miR1155 (1 locus) ( <i>Cre</i> )                                            | miR166 (16 loci, 10RR) ( <i>Sly, Stu, Nta, Vvi, Ath, Osa, Bdi, Pab, Ppt</i> )    |
| miR1436 (1 locus) ( <i>Osa</i> )         | miR1435 (2 loci) ( <i>Osa</i> )                                             | miR169 (17 loci, 2RR) ( <i>Sly, Stu, Nta, Vvi, Ath, Osa, Bdi</i> )               |
| miR1439 (1 locus) ( <i>Osa</i> )         | miR1446 (3 loci) ( <i>Nta</i> )                                             | miR393 (4 loci, 1RR) ( <i>Htu, Stu, Vvi, Ath, Osa, Bdi</i> )                     |
| miR2105 (1 locus) ( <i>Osa</i> )         | miR160 (7 loci) ( <i>Htu, Sly, Stu, Nta, Vvi, Ath, Osa, Bdi, Pab, Ppt</i> ) | miR394 (8 loci, 6RR) ( <i>Nta, Vvi, Ath, Osa, Bdi</i> )                          |
| miR2923 (1 locus) ( <i>Osa</i> )         | miR164 (3 loci) ( <i>Stu, Nta, Vvi, Ath, Osa, Bdi</i> )                     | miR396 (10 loci, 2RR) ( <i>Stu, Nta, Vvi, Ath, Osa, Bdi, Pab</i> )               |
| miR419 (3 loci) ( <i>Ppt</i> )           | miR167 (3 loci) ( <i>Sly, Stu, Nta, Vvi, Ath, Osa, Bdi, Ppt</i> )           | miR407 (2 loci, 1RR) ( <i>Ath</i> )                                              |
| miR5161 (1 locus) ( <i>Osa</i> )         | miR168 (1 locus) ( <i>Sly, Nta, Vvi, Ath, Osa, Bdi</i> )                    | miR414 (31 loci, 27RR) ( <i>Ath, Osa</i> )                                       |
| miR5174 (4 loci) ( <i>Bdi</i> )          | miR171 (3 loci) ( <i>Htu, Sly, Stu, Nta, Vvi, Osa, Bdi</i> )                | miR5021 (7 loci, 6RR) ( <i>Ath</i> )                                             |
| miR5181 (1 locus) ( <i>Bdi</i> )         | miR172 (11 loci) ( <i>Sly, Stu, Nta, Vvi, Ath, Osa, Bdi</i> )               | miR5658 (54 loci, 50RR) ( <i>Ath</i> )                                           |
| miR5185 (1 locus) ( <i>Bdi</i> )         | miR1857 (1 locus) ( <i>Osa</i> )                                            | miR6104 (6 loci, 5RR)                                                            |
| miR5203 (2 loci) ( <i>Bdi</i> )          | miR1862 (1 locus) ( <i>Osa</i> )                                            | miR6105 (910 loci, 869RR)                                                        |
| miR530 (3 loci) ( <i>Htu, Stu, Osa</i> ) | miR1888 (1 locus) ( <i>Ath</i> )                                            | miR6107 (3 loci, 2RR)                                                            |
| miR5543 (1 locus) ( <i>Osa</i> )         | miR2079 (1 locus) ( <i>Ppt</i> )                                            | miR6108 (1495 loci, 1183RR)                                                      |
| miR5653 (2 loci) ( <i>Ath</i> )          | miR2102 (1 locus) ( <i>Osa</i> )                                            | miR6109 (131 loci, 117RR)                                                        |
| miR5821 (1 locus) ( <i>Osa</i> )         | miR390 (1 locus) ( <i>Stu, Nta, Vvi, Ath, Osa, Bdi, Ppt</i> )               | miR6110 (161 loci, 150RR)                                                        |
| miR6106 (2 loci)                         | miR395 (8 loci) ( <i>Stu, Nta, Vvi, Ath, Osa, Bdi, Pab</i> )                | miR6112 (1301 loci, 1195RR)                                                      |
| miR6111 (1 locus)                        | miR397 (3 loci) ( <i>Sly, Stu, Bdi, Pab</i> )                               | miR6115 (480 loci, 414RR)                                                        |
| miR7741 (1 locus) ( <i>Bdi</i> )         | miR399 (5 loci) ( <i>Sly, Stu, Nta, Vvi, Ath, Osa, Bdi</i> )                | miR6117 (43 loci, 40RR)                                                          |
| miR7757 (1 locus) ( <i>Bdi</i> )         | miR403 (1 locus) ( <i>Htu, Vvi, Ath</i> )                                   | miR845 (6 loci, 3RR) ( <i>Vvi, Ath</i> )                                         |
| miR902 (1 locus) ( <i>Ppt</i> )          | miR408 (1 locus) ( <i>Stu, Nta, Osa, Bdi, Ppt</i> )                         |                                                                                  |
|                                          | miR477 (3 loci) ( <i>Stu, Nta</i> )                                         |                                                                                  |
|                                          | miR479 (2 loci) ( <i>Stu, Nta, Vvi</i> )                                    |                                                                                  |
|                                          | miR5058 (1 locus) ( <i>Bdi</i> )                                            |                                                                                  |
|                                          | miR5523 (1 locus) ( <i>Osa</i> )                                            |                                                                                  |
|                                          | miR6103 (3 loci)                                                            |                                                                                  |
|                                          | miR6114 (2 loci)                                                            |                                                                                  |
|                                          | miR6116 (15 loci)                                                           |                                                                                  |
|                                          | miR837 (1 locus) ( <i>Ath</i> )                                             |                                                                                  |

## Supplementary data

### Genome completeness

The GMAP aligner (Wu *et al.*, 2005) was adopted to assess the completeness of the globe artichoke genome using the existing ESTs of *C. cardunculus*. Different analyses were conducted varying the -x parameter (x = off, 100, 200, 300 and 400), which enables alignment of chimeric reads, and may help with some non-chimeric reads. The total number of unigenes found was obtained by considering both unique alignments and multi-exonic alignments. It reached a maximum of 35,138 (-x = 400) and 33,729 (-x = 200) with a mapping percentage of 95.59% and 91.81%, respectively. The non-mapping reads (978) remained constant even when varying the -x parameters. All the GMAP outputs are reported in the Supplementary table S1a.

The CEGMA (Core Eukaryotic Genes Mapping Approach; Parra *et al.*, 2007), pipeline was adopted to assess the completeness of the globe artichoke genome. A set of 248 core proteins that are present in a wide range of taxa, thereby are highly conserved, have been used to identify their exon-intron structures in genomic sequences. The lack of complete alignments for less conserved ortholog groups are probably due to divergence (CEGMA), while partial alignments confirm an even representation of different ortholog groups, indicating a gene space coverage ranging between 95% to 98.5 % (Supplementary table S1b).

### Plastid and mitochondrial sequences

We searched the globe artichoke WGS assembly for fragments with similarity to chloroplast DNA. The search was conducted on a filtered dataset which did not include the scaffolds which were previously attributed to any linkage groups in order to avoid false positive hits to chloroplast hits genes resident in the genome). Using BlastN (e-value  $\leq 10^{-5}$ ; Altschul 1997), we compared the filtered assembly to a draft of the *C. cardunculus* chloroplast genome (KM035764, Curci *et al.*, 2015). This search revealed few scaffolds with significant similarity, ranging from about 1 kb to 82 Kb in length that consisted primarily of chloroplast DNA. Chloroplast-like scaffolds were filtered out from the draft, using BLASTn data related to pairs presenting more than 95% identity and nucleotide coverage exceeding 10%. We did not detect a complete assembly of the plastid genome among the globe artichoke scaffolds, while many occurrences of plastid-related sequences were observed within the mapped scaffolds of nuclear DNA. The amount of mitochondrial sequence was surveyed as well and a few scaffolds showed similarity to *Nicotiana tabacum* mitochondrial DNA (NC\_006581), none of them contained significant portions of the mitochondrial genome. The lack of organellar scaffolds is probably a consequence of ALLPATHs LG ignoring reads with unexpectedly high read depth.

### miRNAs analysis in globe artichoke

Overall 4,832 genomic regions (Supplementary file S1) distributed on the 17 pseudomolecules (on average 284 regions for pseudomolecule) were predicted to be candidate miRNA-coding loci belonging to 73 different miRNAs (Supplementary table S7). Of these, 4,478 regions (93%) represented only 6 *C. cardunculus*-specific miRNAs (namely miR6105, miR6108, miR6109, miR6110, miR6112, miR6115). Evidence of expression (RNAseq) was found for 122 out of 4,832 predicted putative miRNA-coding regions (2.5%; >10 reads). Considering publicly available unigene (Scaglione *et al.*, 2012) and EST (Lai *et al.*, 2009) datasets, evidence of expression was found for 882 miRNA-related genomic regions for the former, while ESTs gave evidence of expression for 789 miRNA-related genomic regions. Note that because of the presence of several miRNA putative paralogs, different loci were declared as expressed

based on the same EST or transcripts data. Consequently, the number of different associated transcripts and ESTs was lower: 188 transcripts (3.89%; 79 of them are functionally annotated) and 105 EST (2.17%) respectively. By considering as evidence of expression the combination of RNAseq data (> 10 reads reads) aligned) and at least one EST or one transcript, 119 miRNA-related regions (out of the 122 RNAseq-positives, >10 reads) were identified as putatively expressed (97.5%). The summary of the expression data for each putative miRNA-coding genomic region is reported in Supplementary file S2.

## Supplementary literature

- Altschul, S.F., *et al.* Gapped BLAST and PSI-BLAST: a new generation of protein database search programs. *Nucleic Acids Res.* 25:3389-3402 (1997).
- Curci, P., De Paola, D., Danzi, D., Vendramin, G. & Sonnante, G. Complete Chloroplast Genome of the multifunctional Crop Globe Artichoke and Comparison with Other Asteraceae. *Plos One* 10 (2015).
- Lai, Z. *et al.* Genomics of Compositae weeds: EST libraries, microarrays, and evidence of introgression. *American Journal of Botany*, 99(2), 1–10 (2012).
- Parra, G., Bradnam, K. & Korf, I. CEGMA: a pipeline to accurately annotate core genes in eukaryotic genomes. *Bioinformatics* 23, 1061-1067 (2007).
- Scaglione, D. *et al.* Large-scale transcriptome characterization and mass discovery of SNPs in globe artichoke and its related taxa. *Plant Biotech. J.* 10, 956-969 (2012).
- Wu T.W., & Watanabe, C.K.. GMAP: a genomic mapping and alignment program for mRNA and EST sequences. *Bioinformatics* 21: 1859-187 (2005).

## Supplementary file list

**Supplementary file S1** – List of the 1,170 globe artichoke specific genes.

**Supplementary file S2** – MiRNAs genomic coordinates and features.

**Supplementary file S3** – Annotation of miRNA targets (a) and their GO enrichment analysis (b).
